# Supplementary material for: Serum Proteins Associated with Blood–Brain Barrier as Potential Biomarkers for Seizure Prediction
Source: MDPI journal article supplement (doi:10.3390/ijms232314712), 2022-11-25
Supplement: s1 [file s1]

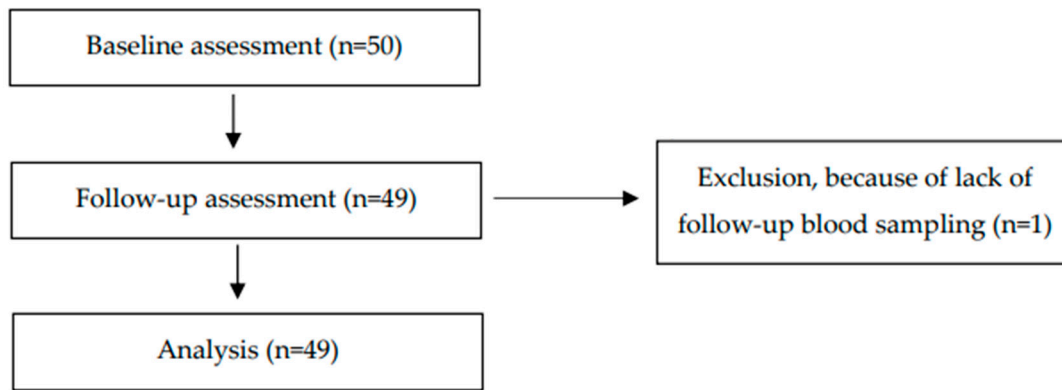

**Figure S1.** Study flow chart.

**Table S1.** Differences in the seizure count between baseline and follow-up.

| differences in seizure count |               |               |              |             |             |                   |              |               |               |
|------------------------------|---------------|---------------|--------------|-------------|-------------|-------------------|--------------|---------------|---------------|
| before examination           |               |               |              |             |             | after examination |              |               |               |
| period                       |               |               |              |             |             |                   |              |               |               |
| [m - months.<br>d – days]    | 12 m          | 6 m           | 3 m          | 1 m         | 7 d         | 1 m               | 3 m          | 6 m           | 12 m          |
| mean                         | 1.12          | (-)0.41       | 0.41         | 0.08        | (-)0.02     | 0.00              | (-)0.76      | (-)1.31       | 0.39          |
| ± SEM                        | ± 1.49        | ± 0.73        | ± 0.30       | ± 0.11      | ± 0.03      | ± 0.14            | ± 0.49       | ± 0.69        | ± 1.28        |
| median                       | 0             | 0             | 0            | 0           | 0           | 0                 | 0            | 0             | 0             |
| min-max                      | (-)30<br>- 88 | (-)25<br>- 34 | (-)6<br>- 14 | (-)3<br>- 5 | (-)1<br>- 1 | (-)6<br>- 5       | (-)30<br>- 5 | (-)32<br>- 10 | (-)34<br>- 60 |

**Table S2.** Differences in the levels of molecules between the no-seizure and seizure group at baseline.

|         | patients without seizures |        |           | patients with seizures |        |           | p      |
|---------|---------------------------|--------|-----------|------------------------|--------|-----------|--------|
|         | mean                      | median | min-max   | mean                   | median | min-max   |        |
|         | ± SEM                     |        |           | ± SEM                  |        |           |        |
| MMP-9   | 605.70                    | 544.93 | 311.76    | 850.18                 | 701.52 | 125.22    | 0.1038 |
| [ng/ml] | ± 104.37                  |        | - 1899.46 | ± 90.48                |        | - 2555.34 |        |
| TIMP-1  | 218.93                    | 260.23 | 29.60     | 244.00                 | 256.50 | 2.69      | 0.5801 |
| [ng/ml] | ± 30.33                   |        | - 402.59  | ± 19.61                |        | - 464.72  |        |
| MMP-2   | 279.58                    | 243.00 | 155.99    | 293.89                 | 286.50 | 133.86    | 0.4192 |
| [ng/ml] | ± 32.29                   |        | - 548.59  | ± 17.45                |        | - 538.70  |        |

|         |             |        |             |             |        |             |        |
|---------|-------------|--------|-------------|-------------|--------|-------------|--------|
| CCL-2   | 311.02      |        | 112.47      | 331.93      |        | 118.12      |        |
| [pg/ml] | ± 39.68     | 277.58 | - 548.00    | ± 25.24     | 315.43 | - 771.43    | 0.6107 |
| P-sel   | 83.55       |        | 6.62        | 114.25      |        | 9.05        |        |
| [ng/ml] | ± 20.27     | 38.60  | - 228.47    | ± 10.75     | 110.00 | - 240.68    | 0.0969 |
| TIMP-2  | 161.79      |        | 112.23      | 144.88      |        | 95.16       |        |
| [ng/ml] | ± 11.48     | 156.67 | - 257.58    | ± 4.06      | 142.73 | - 205.19    | 0.2982 |
| S100B   | 83.34       |        | 0.29        | 27.30       |        | 0.35        |        |
| [pg/ml] | ± 40.65     | 41.38  | - 571.13    | ± 4.56      | 19.13  | - 144.50    | 0.1806 |
| ICAM-1  | 175.47      |        | 103.34      | 184.48      |        | 110.39      |        |
| [ng/ml] | ± 15.20     | 161.40 | - 310.27    | ± 12.33     | 167.27 | - 437.03    | 0.7651 |
| TSP-2   | 32.24       |        | 11.17       | 28.55       |        | 8.83        |        |
| [ng/ml] | ± 4.47      | 29.94  | - 61.04     | ± 3.19      | 21.74  | - 96.59     | 0.3034 |
| MMP-9   |             |        | 1.33 -      |             |        | 0.66 -      |        |
| /TIMP-1 | 5.31 ± 1.99 | 2.08   | 27.92       | 8.78 ± 3.80 | 2.85   | 131.21      | 0.4585 |
| MMP-2   |             |        |             |             |        |             |        |
| /TIMP-2 | 1.74 ± 0.18 | 1.55   | 1.01 - 3.61 | 2.04 ± 0.11 | 2.05   | 0.83 - 3.86 | 0.0904 |

**Table S3.** Differences in the levels of molecules in patients without seizures at baseline and follow-up.

|         | baseline |        |           | follow-up |        |           | p      |
|---------|----------|--------|-----------|-----------|--------|-----------|--------|
|         | mean     | median | min-max   | mean      | median | min-max   |        |
|         | ± SEM    |        |           | ± SEM     |        |           |        |
| MMP-9   | 605.70   |        | 311.76    | 515.55    |        | 68.53     |        |
| [ng/ml] | ± 104.37 | 544.93 | - 1899.46 | ± 82.06   | 444.79 | - 1148.87 | 0.1981 |
| TIMP-1  | 218.93   |        | 29.60     | 72.04     |        | 3.83      |        |
| [ng/ml] | ± 30.33  | 260.23 | - 402.59  | ± 11.96   | 81.29  | - 151.74  | 0.0013 |
| MMP-2   | 279.58   |        | 155.99    | 210.85    |        | 97.15     |        |
| [ng/ml] | ± 32.29  | 243.00 | - 548.59  | ± 20.17   | 201.43 | - 413.73  | 0.1319 |
| CCL-2   | 311.02   |        | 112.47    | 430.44    |        | 178.57    |        |
| [pg/ml] | ± 39.68  | 277.58 | - 548.00  | ± 47.27   | 382.71 | - 747.29  | 0.0047 |
| P-sel   | 83.55    |        | 6.62      | 126.41    |        | 19.51     |        |
| [ng/ml] | ± 20.27  | 38.60  | - 228.47  | ± 29.61   | 69.47  | - 318.63  | 0.3003 |
| TIMP-2  | 161.79   |        | 112.23    | 154.52    |        | 106.93    |        |
| [ng/ml] | ± 11.48  | 156.67 | - 257.58  | ± 7.25    | 158.10 | - 182.97  | 0.6378 |

|         |             |        |             |             |        |             |        |
|---------|-------------|--------|-------------|-------------|--------|-------------|--------|
| S100B   | 83.34       |        | 0.29        | 63.33       |        | 0.50        |        |
| [pg/ml] | ± 40.65     | 41.38  | – 571.13    | ± 28.23     | 27.55  | – 411.25    | 0.7299 |
| ICAM-1  | 175.47      |        | 103.34      | 177.75      |        | 112.25      |        |
| [ng/ml] | ± 15.20     | 161.40 | – 310.27    | ± 18.10     | 166.28 | – 369.73    | 0.9250 |
| TSP-2   | 32.24       |        | 11.17       | 25.67       |        | 13.23       |        |
| [ng/ml] | ± 4.47      | 29.94  | – 61.04     | ± 4.01      | 20.77  | – 66.60     | 0.3305 |
| MMP-9   |             |        | 1.33 –      | 33.77       |        | 0.45 –      |        |
| /TIMP-1 | 5.31 ± 1.99 | 2.08   | 27.92       | ± 21.01     | 6.61   | 299.90      | 0.0355 |
| MMP-2   |             |        |             |             |        |             |        |
| /TIMP-2 | 1.74 ± 0.18 | 1.55   | 1.01 - 3.61 | 1.37 ± 0.11 | 1.36   | 0.54 – 2.42 | 0.1771 |

**Table S4.** Differences in the levels of molecules in patients with seizures at baseline and follow-up.

|         | baseline      |        |           | follow-up     |        |           | p       |
|---------|---------------|--------|-----------|---------------|--------|-----------|---------|
|         | mean<br>± SEM | median | min-max   | mean<br>± SEM | median | min-max   |         |
| MMP-9   | 850.18        |        | 125.22    | 423.49        |        | 10.15     |         |
| [ng/ml] | ± 90.48       | 701.52 | – 2555.34 | ± 59.58       | 322.61 | – 1699.80 | 0.0004  |
| TIMP-1  | 244.00        |        | 2.69      | 112.03        |        | 9.55      |         |
| [ng/ml] | ± 19.61       | 256.50 | – 464.72  | ± 9.07        | 117.71 | – 216.35  | <0.0001 |
| MMP-2   | 293.89        |        | 133.86    | 196.84        |        | 41.32     |         |
| [ng/ml] | ± 17.45       | 286.50 | – 538.70  | ± 17.40       | 211.62 | – 496.85  | 0.0008  |
| CCL-2   | 331.93        |        | 118.12    | 436.33        |        | 93.14     |         |
| [pg/ml] | ± 25.24       | 315.43 | – 771.43  | ± 34.12       | 403.29 | – 1299.29 | 0.0008  |
| P-sel   | 114.25        |        | 9.05      | 172.17        |        | 16.47     |         |
| [ng/ml] | ± 10.75       | 110.00 | – 240.68  | ± 18.24       | 147.72 | – 389.76  | 0.0038  |
| TIMP-2  | 144.88        |        | 95.16     | 161.51        |        | 92.84     |         |
| [ng/ml] | ± 4.06        | 142.73 | – 205.19  | ± 5.73        | 164.07 | – 244.59  | 0.0337  |
| S100B   | 27.30         |        | 0.35      | 33.94         |        | 0.75      |         |
| [pg/ml] | ± 4.56        | 19.13  | – 144.50  | ± 14.67       | 11.11  | – 516.25  | 0.2383  |
| ICAM-1  | 184.48        |        | 110.39    | 162.72        |        | 36.03     |         |
| [ng/ml] | ± 12.33       | 167.27 | – 437.03  | ± 9.35        | 154.18 | – 340.99  | 0.0270  |
| TSP-2   | 28.55         |        | 8.83      | 26.62         |        | 11.22     |         |
| [ng/ml] | ± 3.19        | 21.74  | – 96.59   | ± 1.99        | 22.60  | – 63.50   | 0.6822  |

|                  |                 |      |                  |                 |      |                 |        |
|------------------|-----------------|------|------------------|-----------------|------|-----------------|--------|
| MMP-9<br>/TIMP-1 | $8.78 \pm 3.80$ | 2.85 | 0.66 –<br>131.21 | $6.64 \pm 1.60$ | 2.93 | 0.07 –<br>38.91 | 0.9347 |
| MMP-2<br>/TIMP-2 | $2.04 \pm 0.11$ | 2.05 | 0.83 - 3.86      | $1.25 \pm 0.11$ | 1.29 | 0.29 - 3.41     | 0.0001 |

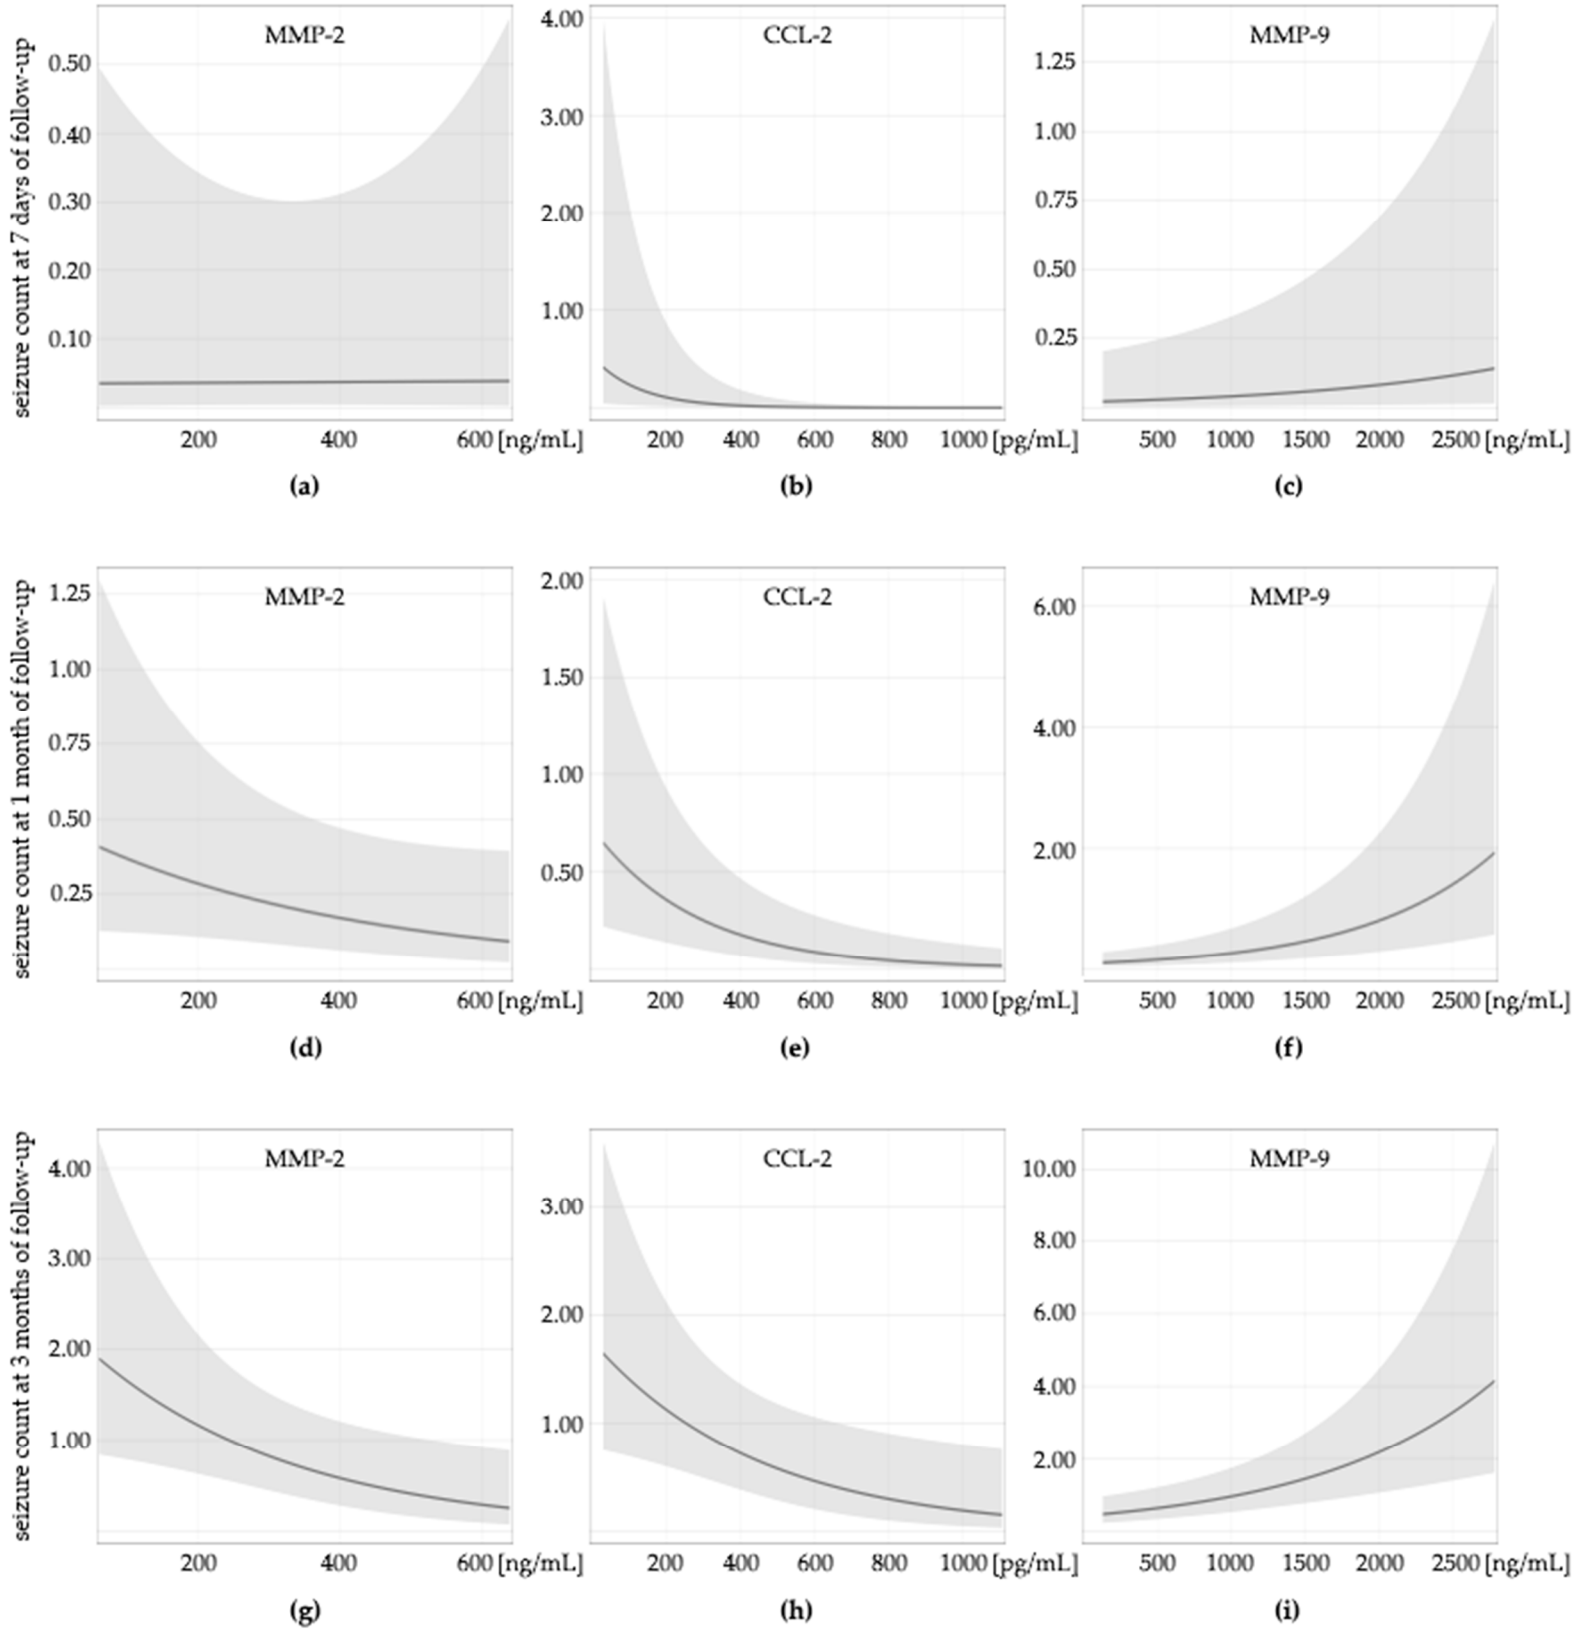

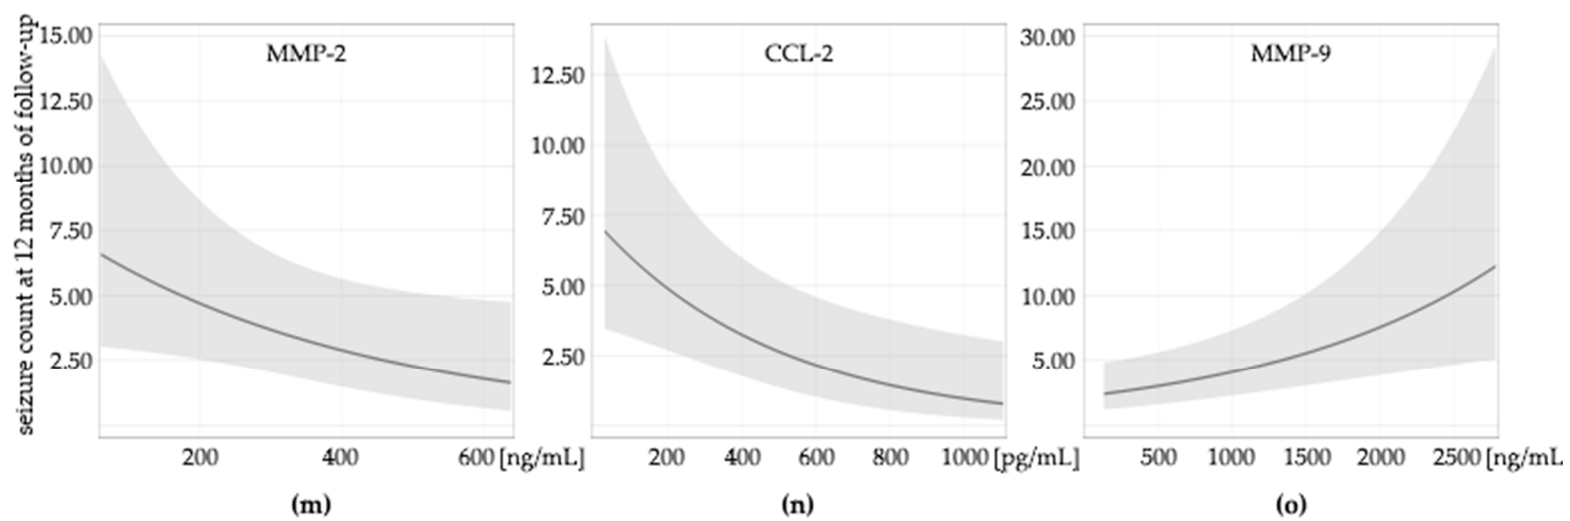

**Figure S2.** The influence of molecule levels on seizure count during follow-up; at 7 days: (a) MMP-2; (b) CCL-2; (c) MMP-9; 1 month (d) MMP-2; (e) CCL-2; (f) MMP-9; 3 months (g) MMP-2; (h) CCL-2; (i) MMP-9; 6 months (j) MMP-2; (k) CCL-2; (l) MMP-9; 12 months (m) MMP-2; (n) CCL-2; (o) MMP-9. GLM.
